# Supplementary material
Source: MDPI journal article supplement (https://www.mdpi.com/1999-4907/9/9/556)
Supplement: s1 [file s1]

## Supplementary

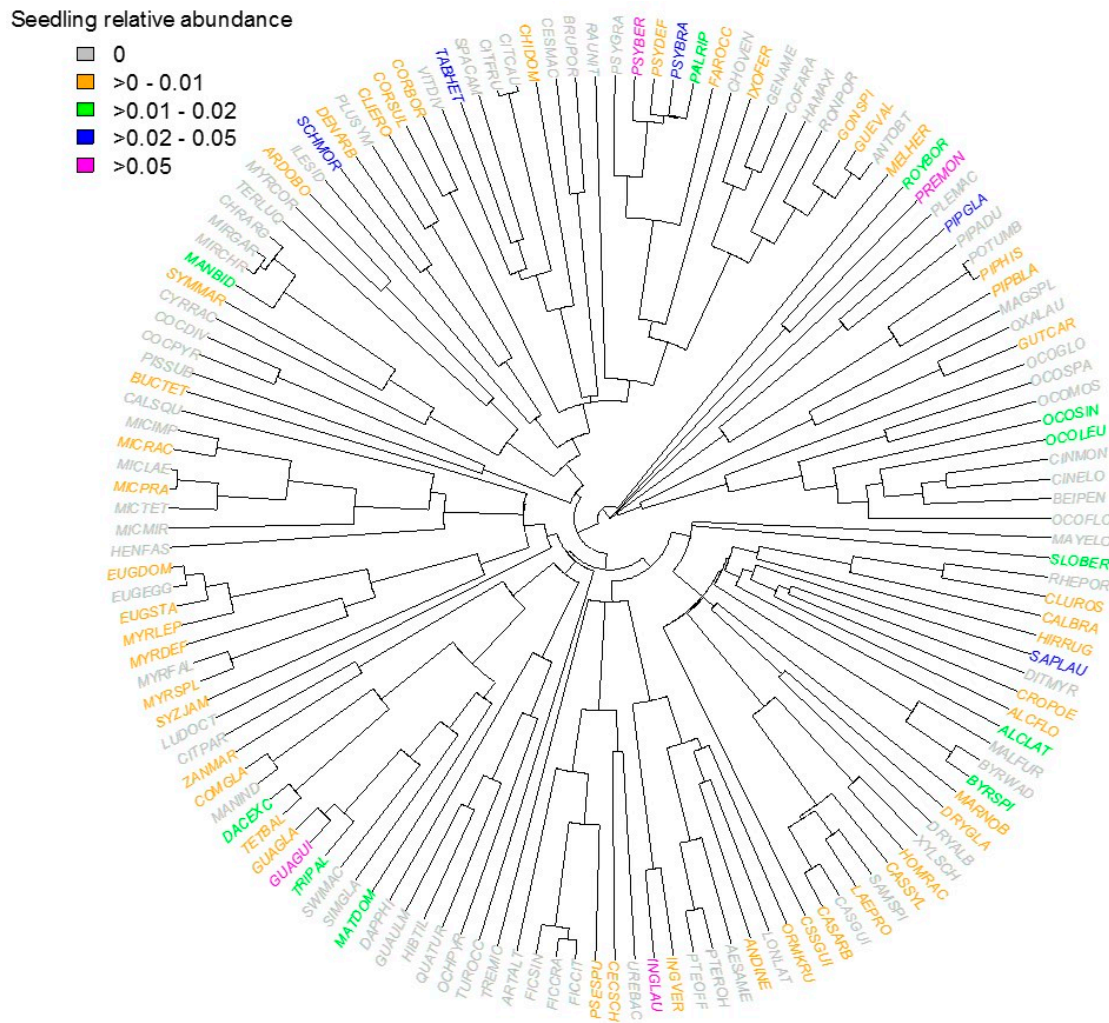

**Figure S1** DNA barcode phylogeny for the Luquillo Forest Dynamics Plot. Colors correspond to species relative abundance in the 2000 seedling census. A table with the full species names and species codes can be downloaded from <http://luq.lter.network/data/luqmetadata118>.

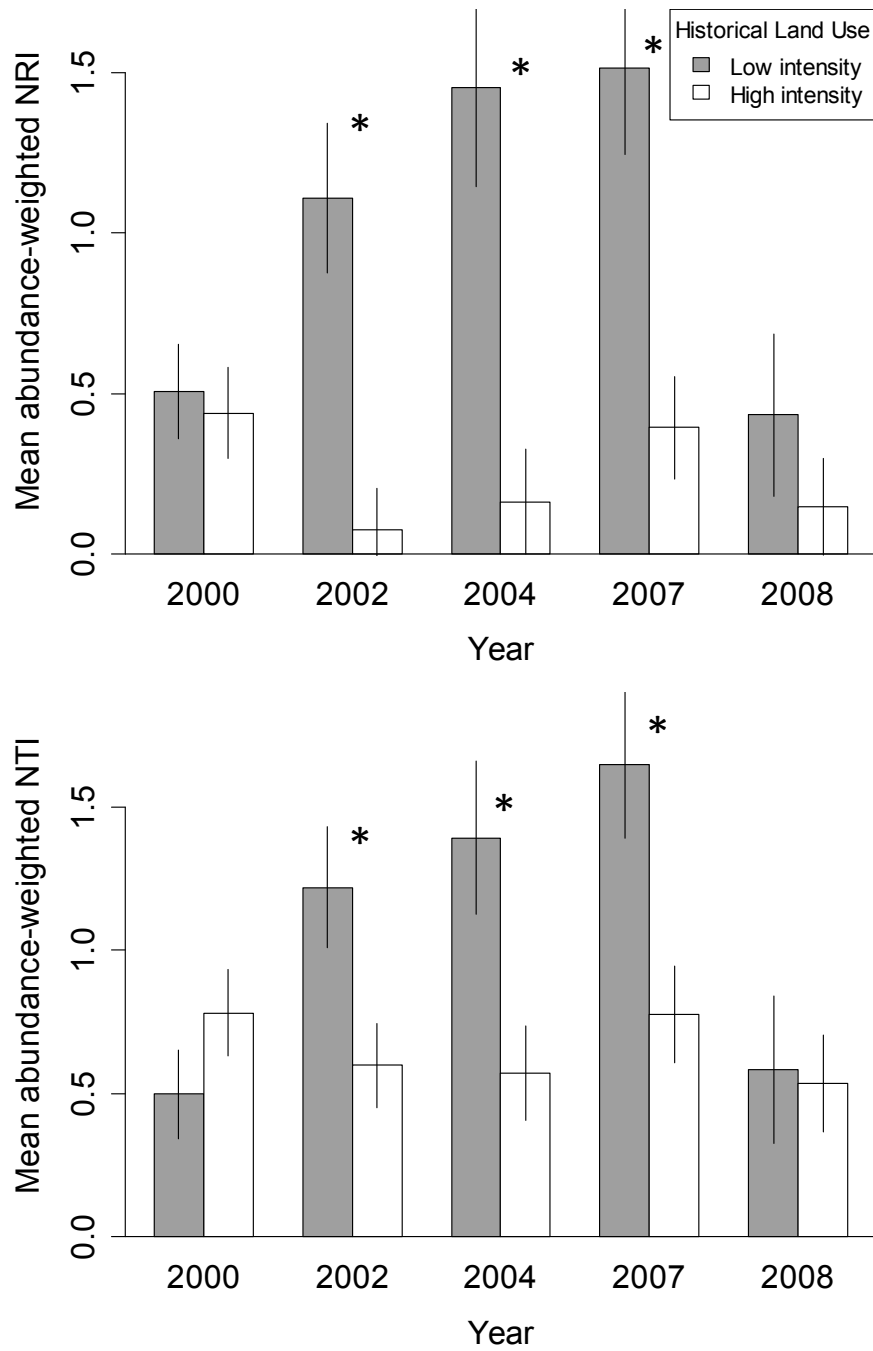

**Figure S2** Mean phylogenetic relatedness of seedlings after excluding palm species in seedling plots located in the low-intensity land-use area (gray bars) versus the high-intensity land-use area (white bars) of the Luquillo Forest Dynamics Plot. Stars (\*) indicate years when values differed significantly between land use history categories ( $\alpha=0.05$ ).

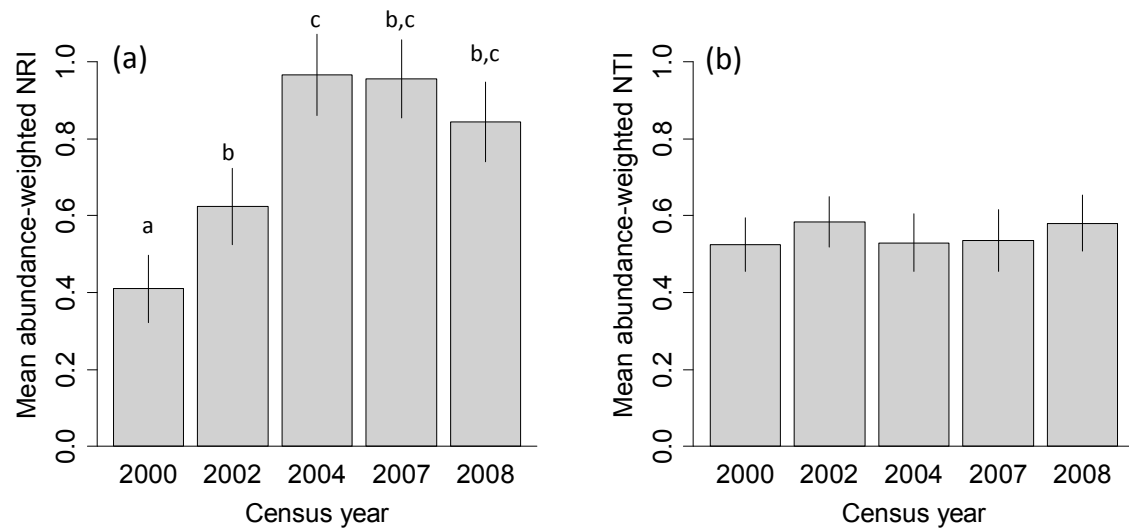

**Figure S3** Mean similarity of seed mass values of seedlings within 2-m<sup>2</sup> seedling plots when palm species are excluded. Values of abundance-weighted NRI (a) and abundance-weighted NTI (b) measure the functional similarity of individuals in each plot. Bars represent 1 s.e. and letters indicate differences between years for NRI. There was no significant variation among years for NTI.

**Table S1** AIC values for neighborhood model comparisons with palm species excluded. Bold values indicate the best fit model (i.e. lowest AIC) for each census interval.

| Model                        | Census interval |               |               |               |
|------------------------------|-----------------|---------------|---------------|---------------|
|                              | 2000-02         | 2002-04       | 2004-07       | 2007-08       |
| Null (No neighbors)          | 4133.2          | 2814.2        | <b>2196.3</b> | 1631.7        |
| Total neighbor density       | 4126.5          | <b>2811.1</b> | 2198.2        | 1633.7        |
| Conspecific neighbor density | 4126.4          | 2811.9        | 2196.6        | 1632.7        |
| Phylogenetic density         | <b>4113.8</b>   | 2812.3        | 2196.6        | <b>1630.4</b> |
